# Supplementary material for: Flowing microenvironments regulate the helical pitch of a semi-artificial polymer
Source: Royal Society of Chemistry journal article supplement (doi:10.1039/c6ra12944g), 2016-01-01
Supplement: c6ra12944g1.pdf [file c6ra12944g1.pdf]

*Supporting Information*

**Flowing microenvironments regulate the helical pitch of a semi-artificial polymer**

*Munenori Numata\* and Naoya Hirose*

**Department of Biomolecular Chemistry, Graduate School of Life and Environmental Sciences, Kyoto Prefectural University, Shimogamo, Sakyo-ku, Kyoto, 606-8522 Japan**

*E-mail: numata@kpu.ac.jp*

**General:** UV–Vis spectra were recorded using a JASCO V-670 apparatus equipped with a thermo controller. CD spectra were recorded using a JASCO J-720 spectrometer. DLS data were obtained using a Malvern Zetasizer Nano-ZS. AFM images were acquired in air using a Shimadzu SPM 9600 instrument (tapping mode); samples were cast on mica and dried for 6 h under reduced pressure prior to observation. Optical microscopy images of the microflow system were acquired using a Keyence VW-6000 microscope. Microfluidic devices were purchased from IMT as custom-made products. All reagents and solvents were purchased from Wako Pure Chemical Industries, Tokyo Chemical Industry, Nacalai Tesque, and Aldrich.

**Flow design:** The focusing hydrodynamic flow featured a cross-point having depth and width of 45 and 100  $\mu\text{m}$ , respectively. The channel length from the inlet to the cross-point was 18 mm. The total channel length was 98 mm.

**Sample preparation:** An aqueous solution [DMSO/water, 1:9 (v/v)] of CUR-Chl (0.5 mg/mL, 0.32 mM/repeating unit) was injected into the central leg at 20  $\mu\text{L}/\text{min}$  and squeezed by lateral THF solutions (0.16 mM) containing bipyridyl ligands injected at 10  $\mu\text{L}/\text{min}$ . The flow rate ratio (central flow/side flow) was fixed at 1.0:0.5, giving a total flow rate of 40  $\mu\text{L}/\text{min}$ . The eluted solution (200  $\mu\text{L}$ ) was diluted with water (200  $\mu\text{L}$ ). The final solvent composition was DMSO/THF/water at 1:10:29 (v/v/v).

In the case of PyPhe-PBI ligand, DMF was used instead of THF, due to poor solubility. An aqueous solution [DMSO/water, 1/9 (v/v)] of CUR-Chl (1.0 mg/mL, [0.64 mM/repeating unit]) and a DMF solution of PyPhe-PBI (0.32 mM) were injected from the central and side legs, respectively. An aqueous solution containing CUR-Chl was injected from the central leg at 40  $\mu\text{L}/\text{min}$  and squeezed by lateral DMF solutions (0.16 mM) containing PyPhe-PBI injected at 20  $\mu\text{L}/\text{min}$ . The flow rate ratio (central flow/side flow) was fixed at 1.0:0.5, giving a total flow rate of 80  $\mu\text{L}/\text{min}$ . To avoid precipitation of the resulting complex, the eluted solution (200  $\mu\text{L}$ ) was poured into mixed solvent [DMF/water, 1:9 (v/v); 200  $\mu\text{L}$ ] instead of water. The final solvent composition was DMSO/DMF/water at 1:12:27 (v/v/v).

The final concentration of the CUR-Chl/PyPhe-PBI complex was double that of the CUR-Chl/PyPBI complex. When the standard concentration of DMF solution (0.16 mM) containing PyPhe-PBI was used, no UV–Vis and CD spectral changes were observed. This result suggests that the binding ability of CUR-Chl depends on the applied flow rate, which influences the orientation of the adjacent chlorophyll units. Under higher flow rates, elongation of the helix decreased its binding ability toward PyPhe-PBI.

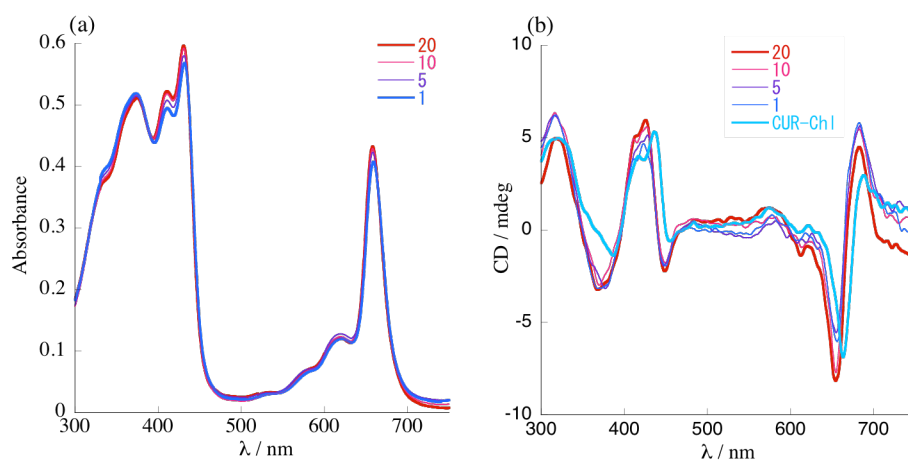

**Figure S1.** (a) UV-Vis (3-mm cell, r.t.) and (b) CD (10-mm cell, r.t.) spectra of CUR-Chl/PVP complexes created in a microflow. Insets: Applied flow rates ( $\mu\text{L}/\text{min}$ ). The [PVP]/[chlorophyll unit] ratio was fixed at 0.5.

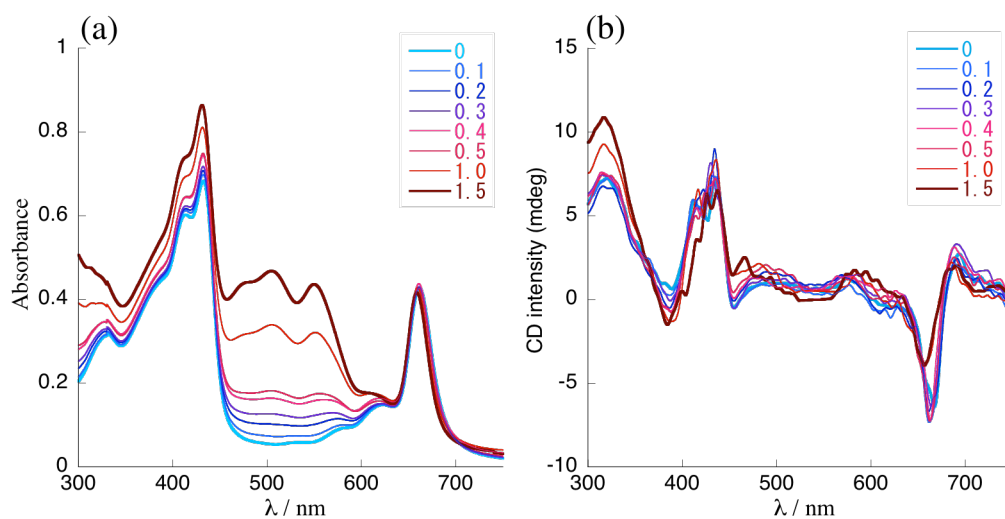

**Figure S2.** (a) UV–Vis (3-mm cell, r.t.) and (b) CD (10-mm cell, r.t.) spectra of solutions of CUR-Chl and Py-PBI [DMSO/THF/water, 1:10:29 (v/v/v)]. These solutions were prepared in a vial through conventional mixing. Insets: [Py-PBI]/[CUR-Chl] ratios. Final concentration of CUR-Chl: 0.12 mg/mL.

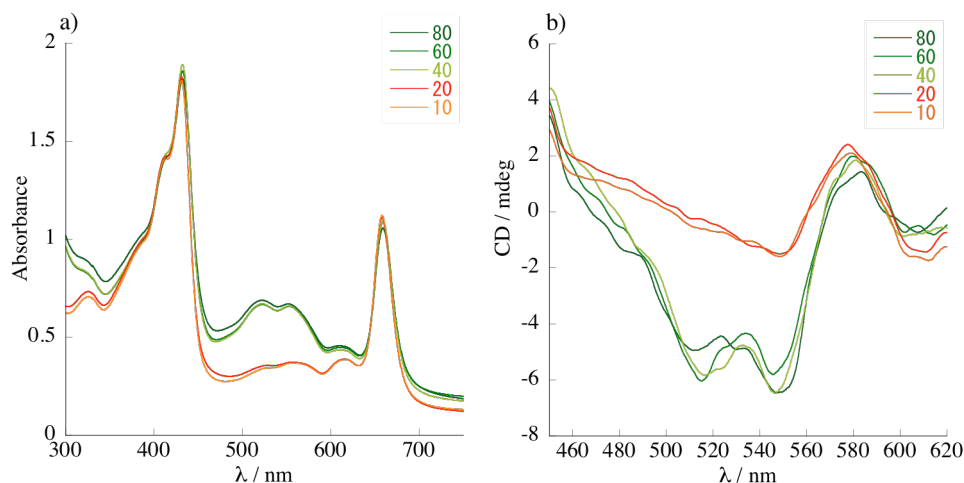

**Figure S3.** (a) UV-Vis (3-mm cell, r.t.) and (b) CD (10-mm cell, r.t.) spectra of CUR-Chl/PyPhe-PBI complexes formed at various flow rates [DMSO/DMF/water, 1:12:27 (v/v/v)]. Inset: Applied flow rates ( $\mu\text{L}/\text{min}$ ). [PyPhe-PBI]/[chlorophyll unit] ratio: 0.5. Final concentration of CUR-Chl: 0.24 mg/mL.

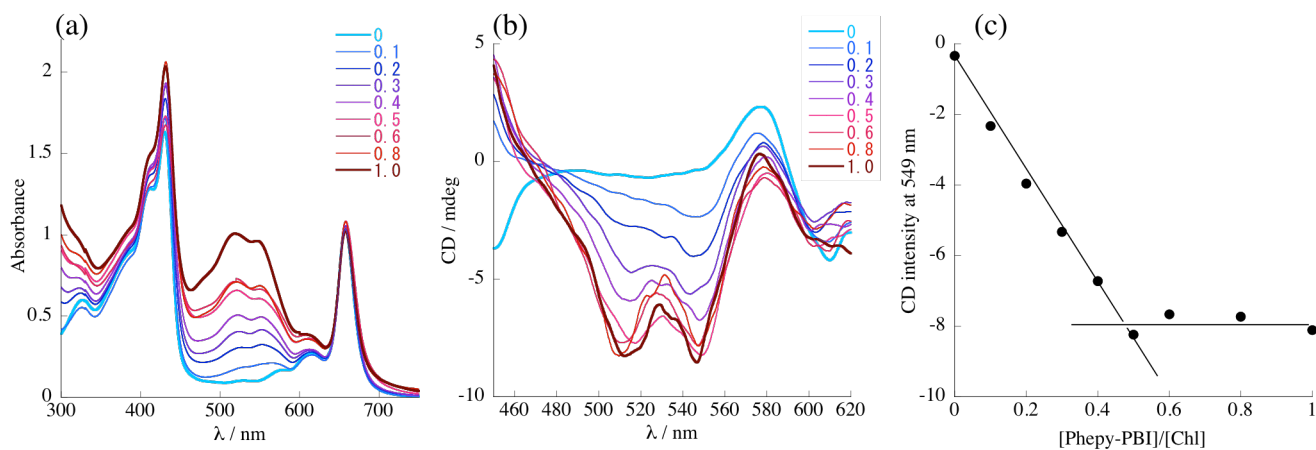

**Figure S4.** (a) UV-Vis (3-mm cell, r.t.) and (b) CD (10-mm cell, r.t.) spectra of CUR-Chl/PyPhe-PBI complexes [DMSO/DMF/water, 1:12:27 (v/v/v)] obtained upon changing the [PyPhe-PBI]/[Chlorophyll unit] ratio; inset: [PyPhe-PBI]/[CUR-Chl] ratio. (c) Plot of CD intensity at 549 nm with respect to [PyPhe-PBI]/[chlorophyll unit] ratio. Final concentration of CUR-Chl: 0.24 mg/mL.

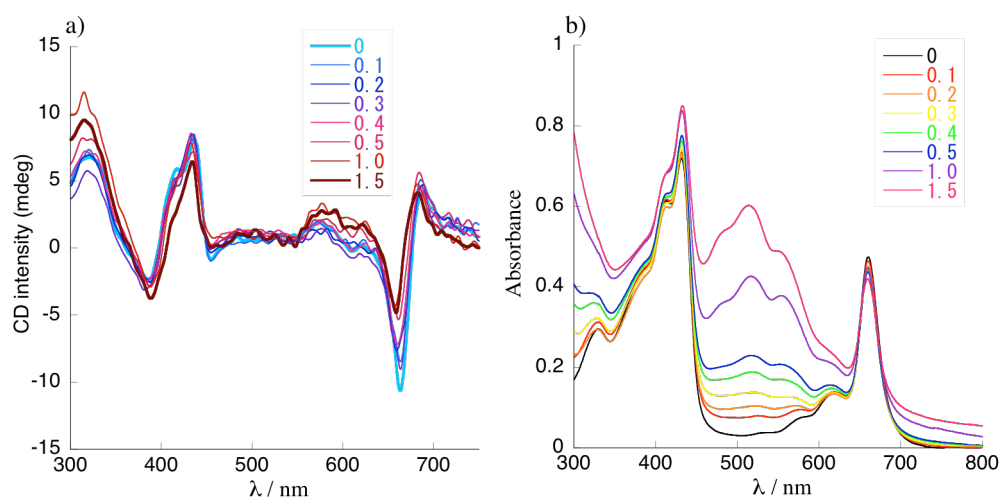

**Figure S5.** (a) UV-Vis (3-mm cell, r.t.) and (b) CD (10-mm cell, r.t.) spectra of solutions containing CUR-Chl and PyPhe-PBI [DMSO/DMF/water, 1:12:27 (v/v/v)]. The solutions were prepared in a vial through conventional mixing. Insets: [PyPhe-PBI]/[Chlorophyll units] ratio. Final concentration of CUR-Chl: 0.12 mg/mL.

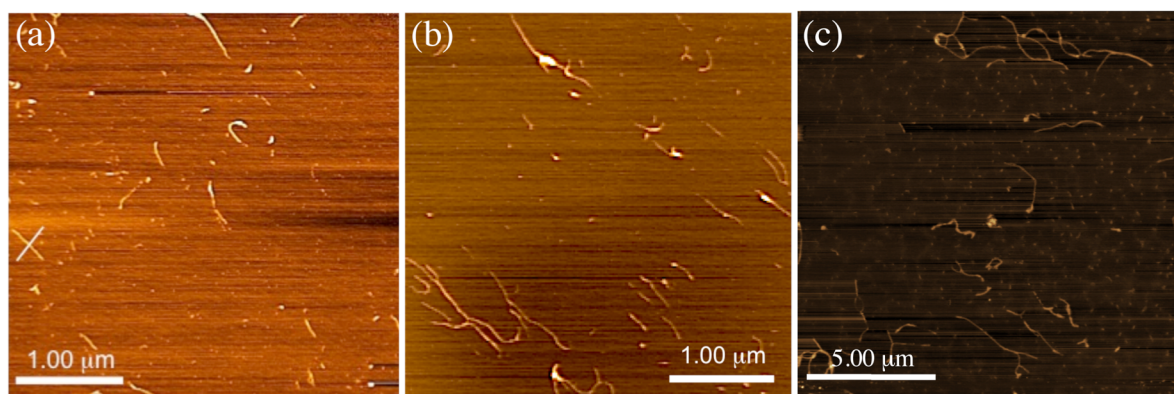

**Figure S6.** AFM images of (a) the Py-PBI/CUR-Chl complex formed at a flow rate of 40  $\mu\text{L}/\text{min}$  and (b, c) the PyPhe-PBI/CUR-Chl complex formed at a flow rate of 80  $\mu\text{L}/\text{min}$ . [Ligand]/[Chlorophyll units] ratio: 0.5; mica substrate.

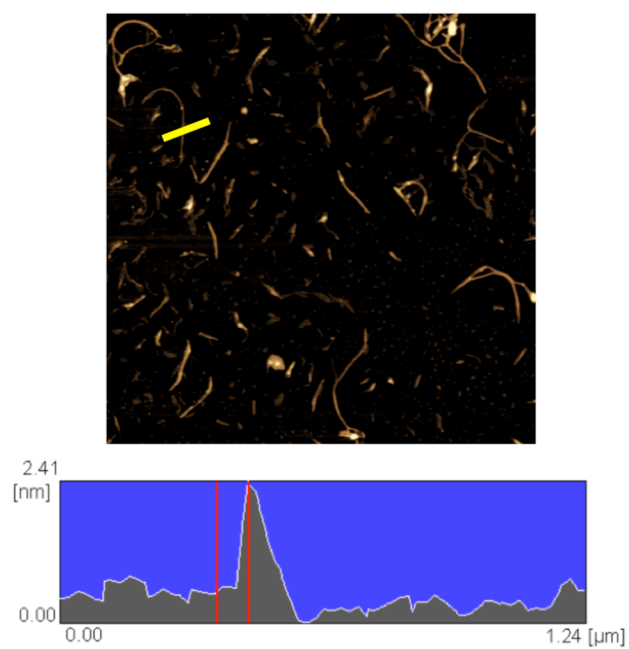

**Figure S7.** AFM height profile (along the yellow line) of the PyPhe-PBI/CUR-Chl complex formed at a flow rate of 80  $\mu\text{L}/\text{min}$ .
